# Supplementary material
Source: MDPI journal article supplement (https://www.mdpi.com/2311-5637/9/9/782)
Supplement: s1 [file s1]

Supplementary data for: Joint multi-optimisation of an extremophilic microbial bioanode for mitigation of mixed hazardous azo dyes in textile synthetic wastewater

**Table S1.** *P* values of studied variables and their quadratic and interaction terms for equation 4 (supplementary data).

| Name         | Coefficient | F.Inflation | Stand Dev | t.exp. | <i>P</i> values |
|--------------|-------------|-------------|-----------|--------|-----------------|
| $\beta_0$    | 1.139       |             | 0.332     | 3.43   | < 0.01**        |
| $\beta_1$    | -0.685      | 1.00        | 0.212     | -3.23  | < 0.01**        |
| $\beta_2$    | -0.602      | 1.00        | 0.212     | -2.36  | < 0.01**        |
| $\beta_3$    | 1.064       | 1.00        | 0.212     | 5.01   | < 0.0001***     |
| $\beta_4$    | 0.608       | 1.00        | 0.212     | 0.98   | < 0.01**        |
| $\beta_{11}$ | -0.289      | 2.33        | 0.562     | -0.51  | = 0.62 NS       |
| $\beta_{22}$ | 1.066       | 2.33        | 0.562     | 1.90   | < 0.05*         |
| $\beta_{33}$ | -0.659      | 2.33        | 0.562     | -1.17  | < 0.05*         |
| $\beta_{44}$ | -0.109      | 2.33        | 0.562     | -0.19  | =0.84NS         |
| $\beta_{12}$ | 0.272       | 1.00        | 0.225     | 1.21   | =0.25NS         |
| $\beta_{13}$ | -0.719      | 1.00        | 0.225     | -3.19  | <0.01**         |
| $\beta_{23}$ | -0.427      | 1.00        | 0.225     | -1.90  | < 0.05*         |
| $\beta_{14}$ | 0.044       | 1.00        | 0.225     | 0.20   | = 0.84NS        |
| $\beta_{24}$ | -0.473      | 1.00        | 0.225     | -2.10  | < 0.05*         |
| $\beta_{34}$ | 0.216       | 1.00        | 0.225     | 0.96   | = 0.35NS        |

NS: non significant, \*\*\*Significant at the level of 99.9%, \*\*Significant at the level 99.0%, \* Significant at the level 95.0%.

**Table S2.** *P* values of studied variables and their quadratic and interaction terms for equation 5 (supplementary data).

| Nom          | Coefficient | F.Inflation | Stand Dev | t.exp. | <i>P</i> values % |
|--------------|-------------|-------------|-----------|--------|-------------------|
| $\beta_0$    | 88.222      |             | 2.537     | 34.77  | < 0.0001***       |
| $\beta_1$    | -2.833      | 1.00        | 1.623     | -1.75  | < 0.05*           |
| $\beta_2$    | -0.556      | 1.00        | 1.623     | -0.34  | =73.6NS           |
| $\beta_3$    | 26.778      | 1.00        | 1.623     | 16.50  | ***               |
| $\beta_4$    | 1.222       | 1.00        | 1.623     | 0.75   | =47.1NS           |
| $\beta_{11}$ | -5.833      | 2.33        | 4.293     | -1.36  | =19.7NS           |
| $\beta_{22}$ | 1.667       | 2.33        | 4.293     | 0.39   | =70.5NS           |
| $\beta_{33}$ | -28.333     | 2.33        | 4.293     | -6.60  | < 0.0001***       |
| $\beta_{44}$ | 0.667       | 2.33        | 4.293     | 0.16   | =87.4NS           |
| $\beta_{12}$ | 0.938       | 1.00        | 1.721     | 0.54   | =60.1NS           |
| $\beta_{13}$ | -2.938      | 1.00        | 1.721     | -1.71  | < 0.05*           |
| $\beta_{23}$ | 0.188       | 1.00        | 1.721     | 0.11   | =91.1NS           |
| $\beta_{14}$ | 0.438       | 1.00        | 1.721     | 0.25   | =79.9NS           |
| $\beta_{24}$ | -2.438      | 1.00        | 1.721     | -1.42  | < 0.05*           |
| $\beta_{34}$ | 0.438       | 1.00        | 1.721     | 0.25   | =79.9NS           |

NS: non significant, \*\*\*Significant at the level of 99.9%, \*\*Significant at the level 99.0%, \* Significant at the level 95.0%.

**Table S3.** *P* values of studied variables and their quadratic and interaction terms for equation 6 (supplementary data).

| Nom          | Coefficient | F.Inflation | Ecart-Type | t.exp. | Signif. % |
|--------------|-------------|-------------|------------|--------|-----------|
| $\beta_0$    | 71.321      |             | 1.185      | 60.21  | ***       |
| $\beta_1$    | -3.000      | 1.00        | 0.758      | -3.96  | *         |
| $\beta_2$    | -2.333      | 1.00        | 0.758      | -3.08  | 9.0%      |
| $\beta_3$    | 18.333      | 1.00        | 0.758      | 24.20  | **        |
| $\beta_4$    | -3.333      | 1.00        | 0.758      | -4.40  | *         |
| $\beta_{11}$ | -6.815      | 2.33        | 2.005      | -3.40  | 7.5%      |

---

|              |         |      |       |        |       |
|--------------|---------|------|-------|--------|-------|
| $\beta_{22}$ | 16.185  | 2.33 | 2.005 | 8.07   | *     |
| $\beta_{33}$ | -22.815 | 2.33 | 2.005 | -11.38 | **    |
| $\beta_{44}$ | -12.815 | 2.33 | 2.005 | -6.39  | *     |
| $\beta_{12}$ | 2.438   | 1.00 | 0.804 | 3.03   | 9.3%  |
| $\beta_{13}$ | -4.188  | 1.00 | 0.804 | -5.21  | *     |
| $\beta_{23}$ | -1.188  | 1.00 | 0.804 | -1.48  | 27.8% |
| $\beta_{14}$ | -0.188  | 1.00 | 0.804 | -0.23  | 82.9% |
| $\beta_{24}$ | -5.688  | 1.00 | 0.804 | -7.08  | *     |
| $\beta_{34}$ | -1.563  | 1.00 | 0.804 | -1.94  | 19.2% |

---

NS: non significant, \*\*\*Significant at the level of 99.9%, \*\*Significant at the level 99.0%, \* Significant at the level 95.0%. .
